# Supplementary material for: Dinickel(ii) complexes: Preparation and catalytic activity
Source: Royal Society of Chemistry journal article supplement (doi:10.1039/c2dt11398h), 2012-01-01

## Dinickel(II) Complexes-Preparation and Catalytically Activity

Ting-Peng Cheng, Yi-Hung Liu, Shie-Ming Peng and Shiuh-Tzung Liu\*

**Supplementary Materials.** Magnetic susceptibilities of Complexes

Figure S1 Plots of inverse magnetic susceptibilities ( $1/\chi_M$ ) versus temperature for **3**

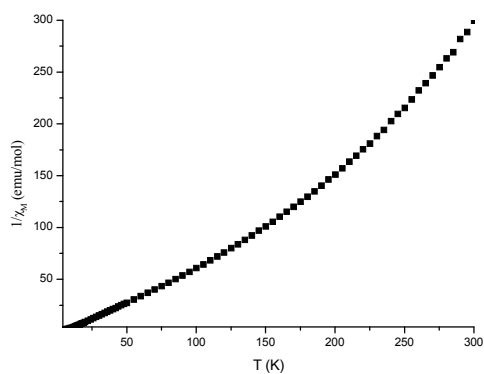

Figure S2 Plots of inverse magnetic susceptibilities ( $1/\chi_M$ ) versus temperature for **4**

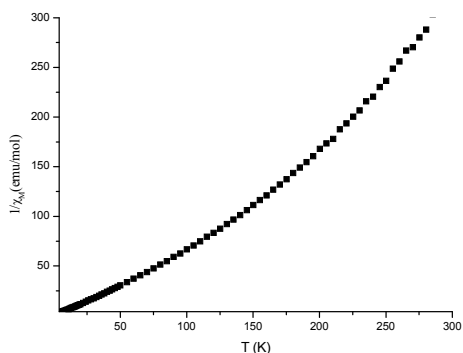

Figure S3 Plots of inverse magnetic susceptibilities ( $1/\chi_M$ ) versus temperature for **5**

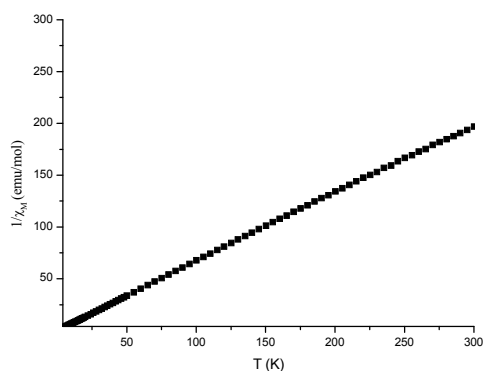

Supplement: c2dt11398h.pdf [file c2dt11398h.pdf]
